# Supplementary material
Source: MDPI journal article supplement (https://www.mdpi.com/2305-7084/8/3/47)
Supplement: s1 [file s1]

**Table S1.** Design matrix for the central composite design.

| Run No. | Block | pH   | Adsorbent (mg) | CTAB (mg) | Response |
|---------|-------|------|----------------|-----------|----------|
| 1       | 1     | 2.42 | 24.93          | 2.82      | 0.242    |
| 2       | 1     | 4.5  | 17.5           | 5.5       | 0.571    |
| 3       | 1     | 6.58 | 24.93          | 2.82      | 0.498    |
| 4       | 1     | 2.42 | 24.93          | 8.18      | 0.412    |
| 5       | 1     | 6.58 | 10.07          | 2.82      | 0.313    |
| 6       | 1     | 4.5  | 17.5           | 5.5       | 0.554    |
| 7       | 1     | 4.5  | 17.5           | 5.5       | 0.534    |
| 8       | 1     | 6.58 | 24.93          | 8.18      | 0.449    |
| 9       | 1     | 2.42 | 10.07          | 2.82      | 0.269    |
| 10      | 1     | 4.5  | 17.5           | 5.5       | 0.456    |
| 11      | 1     | 6.58 | 10.07          | 8.18      | 0.34     |
| 12      | 1     | 4.5  | 17.5           | 5.5       | 0.549    |
| 13      | 1     | 4.5  | 17.5           | 5.5       | 0.56     |
| 14      | 1     | 2.42 | 10.07          | 8.18      | 0.353    |
| 15      | 2     | 4.5  | 17.5           | 5.5       | 0.554    |
| 16      | 2     | 4.5  | 17.5           | 10        | 0.368    |
| 17      | 2     | 4.5  | 5              | 5.5       | 0.323    |
| 18      | 2     | 4.5  | 17.5           | 5.5       | 0.526    |
| 19      | 2     | 1    | 17.5           | 5.5       | 0.203    |
| 20      | 2     | 4.5  | 17.5           | 5.5       | 0.494    |
| 21      | 2     | 8    | 17.5           | 5.5       | 0.391    |
| 22      | 2     | 4.5  | 17.5           | 1         | 0.306    |
| 23      | 2     | 4.5  | 30             | 5.5       | 0.623    |

**Table S2.** Reusability of the adsorbent for nitrite extraction.

| Number of usage | Absorbance <sup>a</sup> | RSD (%) <sup>b</sup> | Recovery (%) |
|-----------------|-------------------------|----------------------|--------------|
| 1st             | 0.60                    | 1.03                 | 97.7         |
| 2nd             | 0.59                    | 1.06                 | 95.2         |
| 3rd             | 0.61                    | 1.00                 | 98.4         |
| 4th             | 0.63                    | 1.74                 | 101.6        |
| 5th             | 0.59                    | 0.98                 | 95.2         |
| 6th             | 0.59                    | 1.00                 | 95.2         |
| 7th             | 0.60                    | 1.03                 | 97.7         |
| 8th             | 0.62                    | 1.20                 | 100          |
| 9th             | 0.58                    | 1.01                 | 93.5         |
| 10th            | 0.61                    | 1.00                 | 98.4         |

<sup>a</sup> At 514 nm. <sup>b</sup> Relative standard deviation (n=3, C=40 ng mL<sup>-1</sup>).

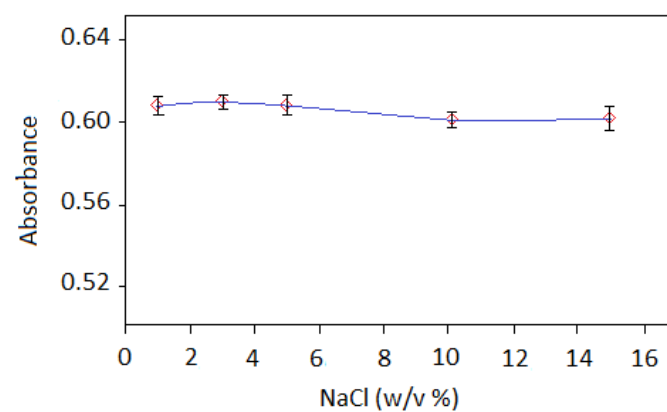

**Figure S1.** Effect of salt concentration on the efficiency of extraction. Conditions: Sample solution (25 mL); pH 6.6; adsorbent 10 mg; and C-TAB, 3 mg.
